# Supplementary material for: Heterologous Expression and Biochemical Characterization of the Human Zinc Transporter 1 (ZnT1) and Its Soluble C-Terminal Domain
Source: PubMed Central journal article supplement (PMC8120272; doi:10.3389/fchem.2021.667803), 2021-04-30
Supplement: Data_Sheet_1.pdf [file Data_Sheet_1.pdf]

## *Supplementary Material*

### 1 Supplementary Tables

**Supplementary Table S1: list of primers**

| <b>Primers</b>         | <b>Sequence</b>                                                                             | <b>Used for</b>                  |
|------------------------|---------------------------------------------------------------------------------------------|----------------------------------|
| hZnT1_Fwd              | ACCCCGGATTCTAGACCTAGTGGATCCCCCATGGGTTGTTGG<br>GGTAGAAACAGAGG                                | Cloning into<br>pDDGFP<br>vector |
| hZnT1_Rev              | AAATTGACCTTGAAAATATAAATTTTCCCCCAAAGAG<br>GATTCAGGTTGC                                       |                                  |
| hZnT1_Rev_t2           | AAATTGACCTTGAAAATATAAATTTTCCCCCTTCAAAGCACATTG<br>AGTTCTACAAGCCAATTCACATGGTTGAATGGTAGTGGCATG | For hZnT1ΔC<br>truncation        |
| hZnT1-CTD-<br>NdeI-Fwd | GGAATTCCATATGATTTTGTGCAAACCGTTCC                                                            | Cloning into<br>pET24a vector    |
| hZnT1-CTD-<br>XhoI-Rev | CCGCTCGAGCAAAGAGGATTCAGGTTGCT                                                               |                                  |

**Supplementary Table S2: Buffers, metals and chemicals used for thermostability assay.**

|          | <b>1</b>                      | <b>2</b>                 | <b>3</b>                | <b>4</b>                 | <b>5</b>                                             | <b>6</b>                                              | <b>7</b>               | <b>8</b>                    | <b>9</b>                     | <b>10</b>                   | <b>11</b>               | <b>12</b>               |
|----------|-------------------------------|--------------------------|-------------------------|--------------------------|------------------------------------------------------|-------------------------------------------------------|------------------------|-----------------------------|------------------------------|-----------------------------|-------------------------|-------------------------|
| <b>A</b> | 100mM Glycine pH 3.0          | 100mM Citric Acid pH 3.2 | 100mM Glycine pH 3.6    | 100mM Citric Acid pH 4.0 | 100mM Sodium Acetate pH 4.5                          | 100mM Sodium Acetate pH 5.0                           | 100mM Phosphate pH 5.0 | 100mM Sodium Citrate pH 5.5 | 100mM Bis Tris pH 6.0        | 100mM Phosphate pH 6.0      | 100mM MES pH 6.2        | 100mM MES pH 6.5        |
| <b>B</b> | 100mM Bis Tris Propane pH 4.5 | 100mM MOPS pH 7.0        | 100mM Phosphate pH 7.0  | 100mM HEPES pH 7.0       | 100mM HEPES pH 7.5                                   | 100mM Tris HCl pH 7.5                                 | 100mM HEPES pH 8.0     | 100mM Tris HCl pH 8.0       | 100mM Bicine pH 8.5          | 100mM Tris HCl pH 8.5       | 100mM CHES pH 9.0       | 100mM CHES pH 9.5       |
| <b>C</b> | 100mM CAPS pH 10              | 80mM NaCl                | 400mM NaCl              | 1M NaCl                  | 20% Glycerol                                         | 40% Glycerol                                          | 200mM Glucose          | 200mM Sucrose               | 100μM CoCl <sub>2</sub>      | 100μM CuCl <sub>2</sub>     | 100μM CaCl <sub>2</sub> | 100μM MgCl <sub>2</sub> |
| <b>D</b> | 100μM ZnCl <sub>2</sub>       | 100μM BaCl <sub>2</sub>  | 100μM LiCl <sub>2</sub> | 100μM NiCl <sub>2</sub>  | 50mM (NH <sub>4</sub> ) <sub>2</sub> SO <sub>4</sub> | 500mM (NH <sub>4</sub> ) <sub>2</sub> SO <sub>4</sub> | Water Minus Protein    | Water Plus Protein          | Protein Buffer Minus Protein | Protein Buffer Plus Protein | Lysozyme Minus Protein  | Lysozyme Plus Protein   |

**Supplementary Table S3: SAXS data collection and analysis details**

| <b>Data Collection Parameters</b>                      | <b>hZnT1-CTD</b>                                     |
|--------------------------------------------------------|------------------------------------------------------|
| Instrument                                             | SAXS-WAXS (Australian Synchrotron)                   |
| Beam geometry                                          | 250 $\mu\text{m}$ (h) $\times$ 450 $\mu\text{m}$ (v) |
| Wavelength ( $\text{\AA}$ )                            | 1.078                                                |
| Sample to detector distance (m)                        | 2.791                                                |
| $q$ -range ( $\text{\AA}^{-1}$ )                       | 0.005 – 0.50                                         |
| Exposure time (s) *                                    | 30 (30 $\times$ 1 s exposures)                       |
| Configuration                                          | In-line SEC-SAXS (S200 5/150 GL) with sheath flow    |
| Injection concentration (mg/mL)                        | 1.5                                                  |
| Injection volume ( $\mu\text{L}$ )                     | 60                                                   |
| Flow rate (mL/min)                                     | 0.45                                                 |
| Temperature (K)                                        | 283                                                  |
| Absolute intensity calibration                         | Water                                                |
| <b>Sample details</b>                                  |                                                      |
| Extinction coefficient ( $A_{280}$ , 0.1% w/v)         | 0.383                                                |
| Partial specific volume ( $\text{cm}^3\text{g}^{-1}$ ) | 0.739                                                |
| Contrast, $\Delta\rho$ ( $10^{10}\text{ cm}^{-2}$ )    | 2.84                                                 |
| Molecular mass [from sequence] (kDa)                   | 18.3                                                 |
| Protein concentration (mg/mL) $^{\S}$                  | -                                                    |
| <b>Structural parameters</b>                           |                                                      |
| $I(0)$ ( $\text{cm}^{-1}$ ) [from Guinier]             | $0.00594 \pm 0.00005$                                |
| $R_g$ ( $\text{\AA}$ ) [from Guinier]                  | $27.5 \pm 0.6$                                       |
| $I(0)$ ( $\text{cm}^{-1}$ ) [from $p(r)$ ]             | $0.00594 \pm 0.00003$                                |
| $R_g$ ( $\text{\AA}$ ) [from $p(r)$ ]                  | $27.9 \pm 0.2$                                       |
| $D_{\text{max}}$ ( $\text{\AA}$ )                      | $100 \pm 3$                                          |
| Porod volume ( $\text{\AA}^3$ )                        | $50000 \pm 2500$                                     |
| <b>Molecular mass determination</b>                    |                                                      |
| Molecular mass [from Porod] (kDa)                      | $41 \pm 2$                                           |
| <b>Software employed</b>                               |                                                      |
| Primary data reduction                                 | <i>Scatterbrain</i> (v 2.71)                         |
| Data processing                                        | <i>PRIMUS</i> (v 3.2) and <i>GNOM</i> (v 4.6)        |
| <i>Ab initio</i> modelling                             | <i>DAMMIN</i> (v 5.3)                                |
| Validation and averaging                               | <i>DAMAVER</i> (v 2.8.0)                             |
| Rigid body modelling                                   | <i>CORAL</i> (v 1.1)                                 |
| Three-dimensional graphics                             | <i>PyMOL</i>                                         |

\*The  $R_g$  across the 30 averaged frames shows no systematic trend, hence, it is deemed that there are no significant interparticle interactions present in the data.

$^{\S}$ The actual protein concentration is unknown, but assuming a protein mass of 40kDa, from  $I(0)$ , the average protein concentration is estimated to be  $\sim 0.2$  mg/mL.

## 2 Supplementary Figures

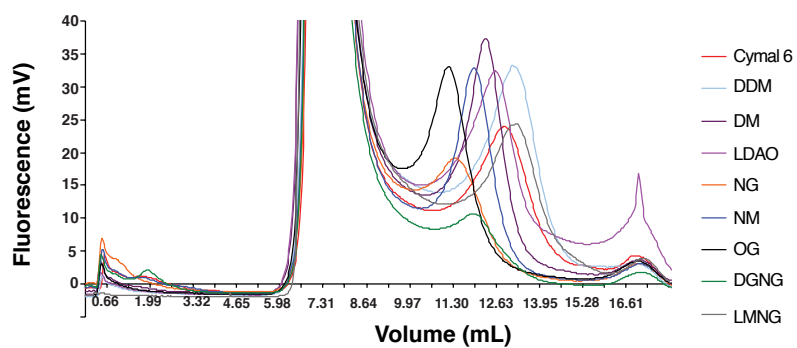

**Supplementary Figure 1.** Detergent screening for hZnT1 analysis. Protein was solubilized in each detergent and analyzed by FSEC as described in material and methods.

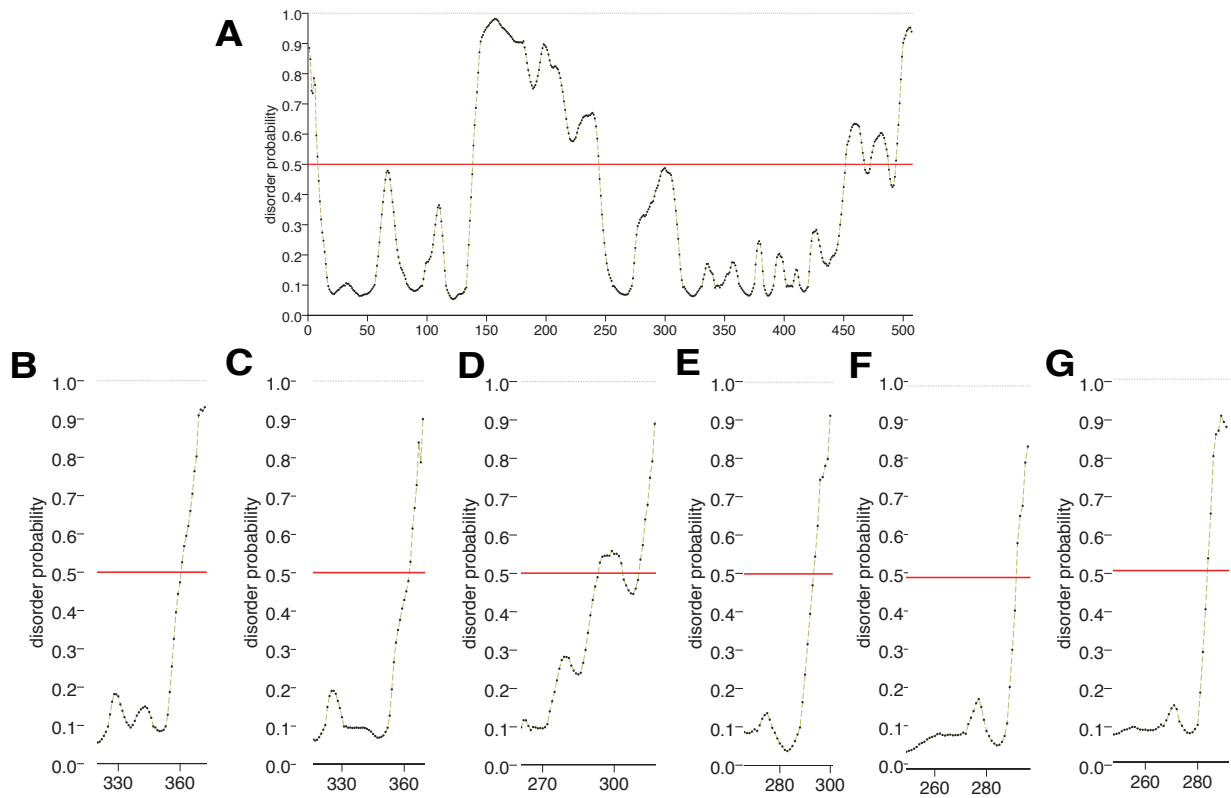

**Supplementary Figure 2.** Disorder prediction of the full-length hZnT1 and the C-terminal domains of other CDF members. Disorder regions were predicted using Protein Disorder Prediction System (PrDOS) server (Ishida and Kinoshita, 2007). The red line indicates 95% confidence of disorder. **(A)** ZnT1 from *Homo sapiens*; **(B)** ZnT2-CTD from *Homo sapiens*; **(C)** ZnT8-CTD from *Homo sapiens*; **(D)** Magnetosome protein (MamM-CTD) from *Magnetospirillum gryphiswaldense*; **(E)** YiiP-CTD from *Escherichia coli*; **(F)** YiiP-CTD from *Shewanella oneidensis*; **(G)** CzrB-CTD from *Thermus thermophilus*.

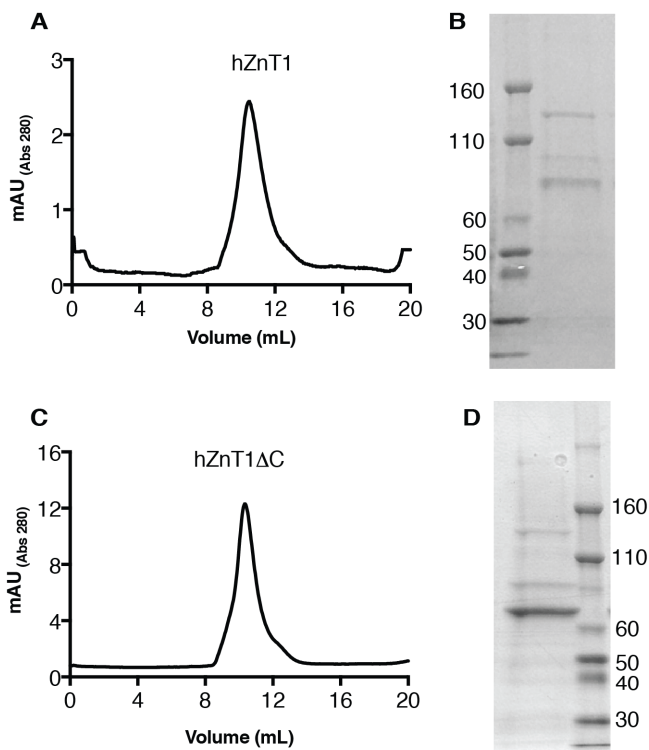

**Supplementary Figure 3.** Size exclusion chromatography of purified hZnT1 and hZnT1ΔC. **(A)** SEC profile of hZnT1 after a two step purification. Protein was loaded into a Superdex 200 10/300 and shows a monodisperse peak at 10 mL. **(B)** Coomassie-stained gel showing molecular weight markers (left lane) and the hZnT1 sample (right lane) (MW: 87.8 kDa). **(C)** SEC profile of hZnT1ΔC after a two step purification. Protein was loaded onto a Superdex 200 10/300. **(D)** Coomassie-stained gel showing molecular weight markers (left lane) and the hZnT1ΔC sample (right lane) (MW: 79.7 kDa).

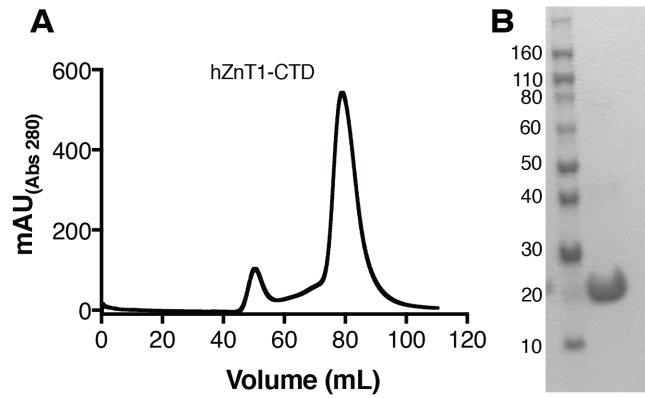

**Supplementary Figure 4.** Size exclusion chromatography of IMAC purified hZnT1-CTD. **(A)** SEC profile of hZnT1-CTD after IMAC purification. Protein was loaded onto a Superdex 200 16/60 column and shows a monodisperse peak at 78 mL. Buffer: 25 mM sodium acetate pH 4.5, 100 mM NaCl, 0.5 mM TCEP; **(B)** Coomassie-stained gel under reducing condition showing molecular weight markers (left lane) and the purified hZnT1-CTD (right lane) (MW:19.5 kDa) after ion exchange chromatography.

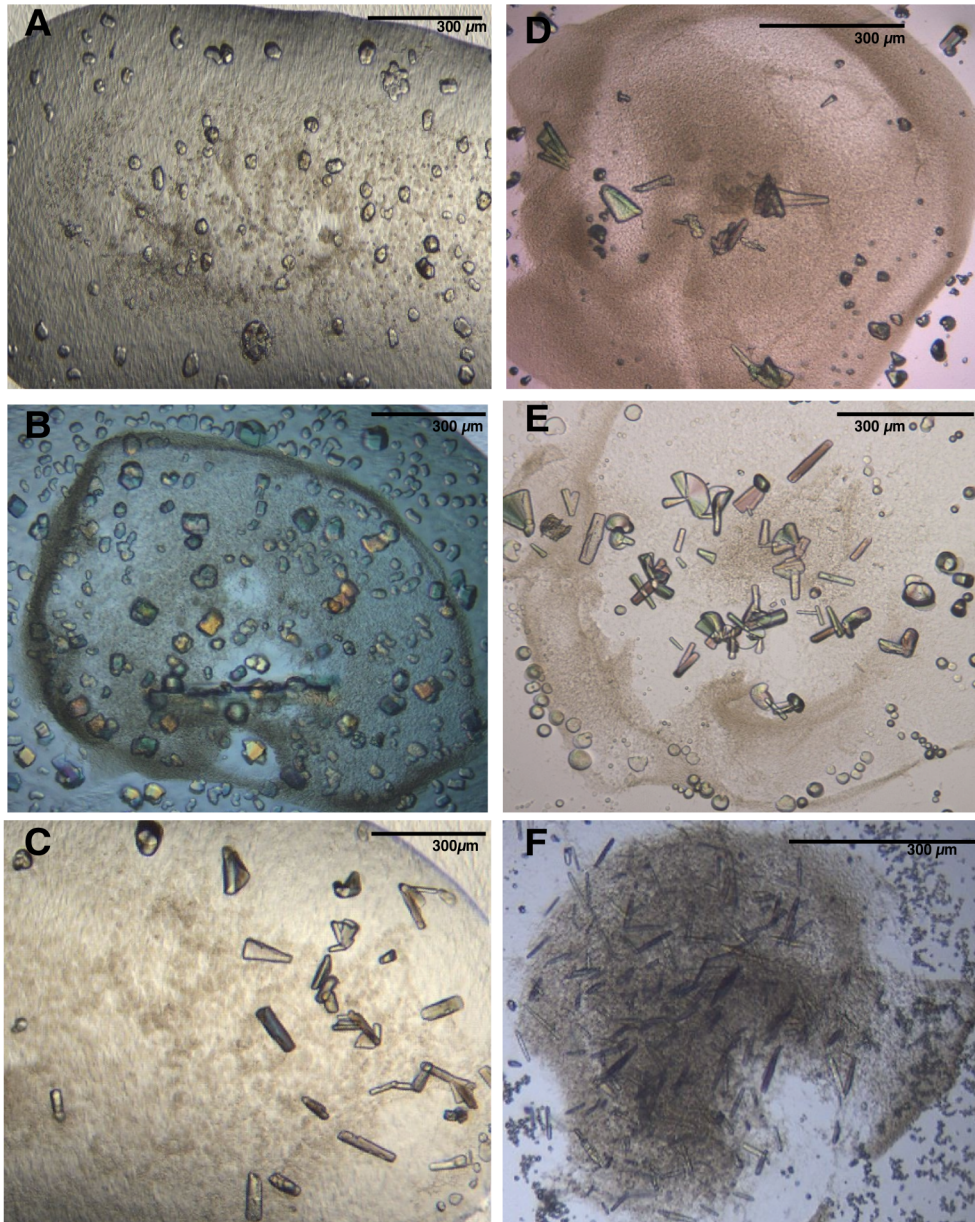

**Supplementary Figure 5.** Outcome of crystallization trials of ZnT1 and hZnT1ΔC. Proteins were purified in buffer containing 20  $\mu\text{M}$  of  $\text{ZnCl}_2$ . **(A)** hZnT1 (10 mg/mL). Crystallization condition: 32% (v/v) PEG 400, 0.05 M  $\text{Mg}(\text{CH}_3\text{COO})_2$ , 0.1 M Glycine pH 9.5. First crystals appeared after day 21; **(B)** hZnT1 (10 mg/mL). Crystallization condition: 32% (v/v) MPEG550, 0.1 M Tris-HCl pH 8.5. First crystals appeared after day 21 **(C)** hZnT1 (10 mg/mL). Crystallization condition: 30% (v/v) PEG 200, 0.1 M MES pH 6.0, 0.1 M NaCl, 0.1 M  $\text{CaCl}_2$ . Crystals appeared after day 80. **(D)** hZnT1ΔC (11 mg/mL). Crystallization condition: 29% (v/v) PEG 400, 0.05 M  $\text{Ca}(\text{C}_2\text{H}_3\text{O}_2)_2$  pH 5.0, 0.2 M NaCl. First crystals appeared after day 21. **(E)** hZnT1ΔC (6 mg/mL). Crystallization condition: 28% (v/v) PEG 400, 0.1 M MES pH 6.5, 0.03 M  $\text{MgCl}_2$ . First crystal appeared after day 57. **(F)** hZnT1ΔC (11.5 mg/mL). Crystallization condition: 26% (v/v) PEG 400, 0.1 M MES pH 6.7, 0.05 M  $\text{Mg}(\text{CH}_3\text{COO})_2$ . First crystals appeared after day 13.



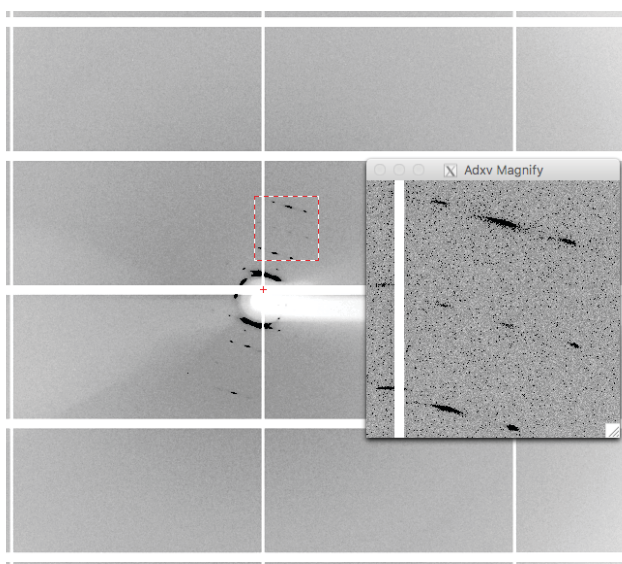

**Supplementary Figure 6. X-ray diffraction from a hZnT1 crystal.** X-ray diffraction from a crystal harvested from Suppl Figure 5C crystallization drop. Diffraction was measured on a ADSC Quantum 315r detector at the MX2 beamline, Australian Synchrotron.

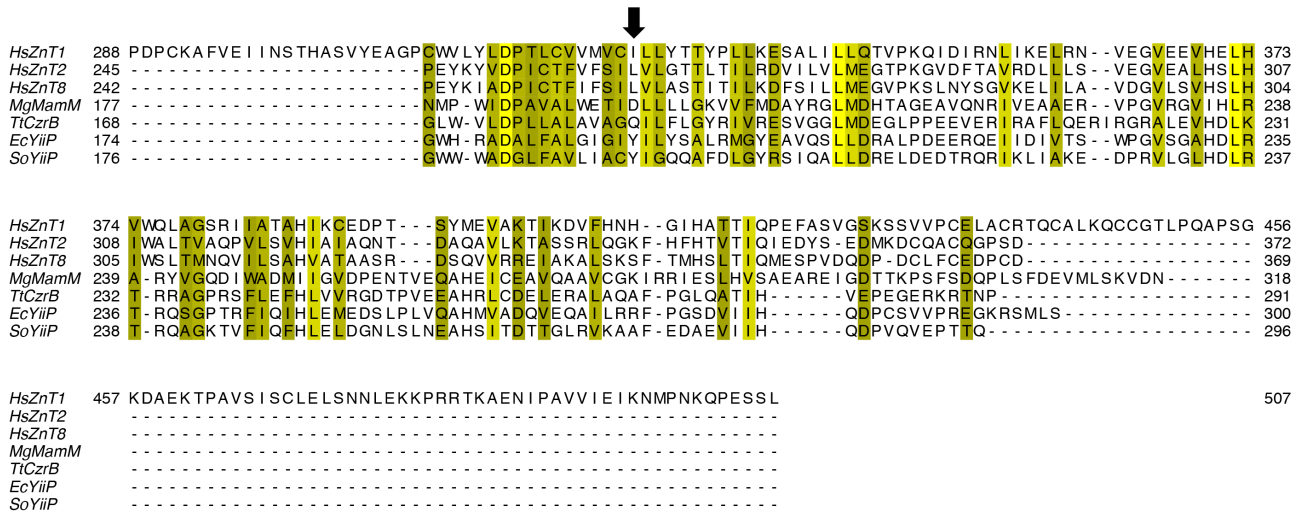

**Supplementary Figure 7. Sequence alignment of the C-terminal domains.** The CTD of human zinc transporters and bacterial CDF members are shown. Alignment was prepared using MUSCLE (Edgar, 2004) and Jalview (Waterhouse et al., 2009). The black arrow indicates the beginning of the soluble C-terminal domain. Accession numbers are as follows: *Homo sapiens* ZnT1 (HsZnT1), Q9Y6M5; *Homo sapiens* ZnT2 (HsZnT2), Q9BRI3-2; *Homo sapiens* ZnT8 (HsZnT8), Q8IWU4; *Magnetospirillum gryphiswaldense* MamM (MgMamM), V6F235; *Thermus thermophilus* CzrB (TtCzrB), Q8VLX7; *Escherichia coli* YiiP (EcYiiP), P69380; *Shewanella oneidensis* YiiP (SoYiiP), Q8E919.

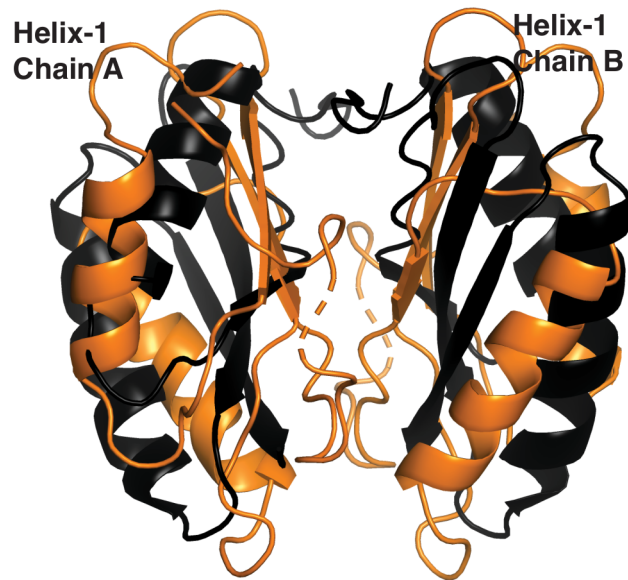

**Supplementary Figure 8.** Structural comparison of hZnT1-CTD model and hZnT8-CTD structure. Superposition of hZnT1-CTD SAXS model (black) with hZnT8-CTD dimer (orange) (PDB code: 6XPE; RMSD of 7.87 Å for 147 C $\alpha$  atoms).

**Supplementary Note 1.** The codon optimized gene sequence used for expression of hZnT1

ATGGGTTGTTGGGGTAGAAACAGAGGTAGATTATTGTGTATGTTGGCCTTGACCTTCATGTTTCATGGTTTTGGA  
 AGTTGTTGTTTCCAGAGTCACTTCTTCTTTGGCTATGTTGTCTGATTCCCTCCACATGTTGTCAGATGTTTTGG  
 CTTTGGTTGTTGCATTGGTTGCTGAAAGATTTGCTAGAAGAACTCATGCTACTCAAAGAACACTTTTCGGTTGG  
 ATTAGAGCTGAAGTTATGGGTGCTTTGGTTAACGCTATTTTCTTGACTGGTTTTGTGCTTCGCCATTTTGTGGA  
 AGCTATTGAAAGATTCATCGAACCACACGAAATGCAACAACCTTTAGTTGTTTTGGGTGTTGGTGTAGCTGGTT  
 TGTTGGTTAATGTTTTAGGTTTGTGTTTGTCCACCACCCTCTGGTTTTTCTCAAGATTCTGGTCATGGTCAT  
 TCTCATGGTGGTCACGGTCATGGTCACGGTTTGCCAAAAGGTCCAAGAGTTAAGTCTACTAGACCAGGTTCTTC  
 CGATATTAACGTTGCTCCAGGTGAACAAGGTCCAGATCAAGAAGAACTAATACCTTGGTTGCTAACACCTCTA  
 ACTCTAACGGTTTTGAAATTGGATCCAGCCGATCCAGAAAATCCAAGATCTGGTGATACTGTTGAAGTTCAAGTC  
 AACGGTAACTTGGTTAGAGAACCAGATCATATGGAATTGGAAGAAGATAGAGCTGGTCAATTGAATATGAGAGG  
 TGTTTTCTTGCATGTCTTGGGTGATGCTTTGGGTTCTGTTATCGTTGTTGTTAACGCTTTGGTTTTCTACTTCT  
 CTTGGAAGGGTTGTTCTGAAGGTGATTTTTGTGTTAACCCATGTTTCCAGATCCATGTAAGGCTTTTCGTTGAA  
 ATTATCCAATCTACCCATGCCTCTGTTTATGAAGCTGGTCCATGTTGGGTCTTGTACTTAGATCCAACCTTTGTG  
 TGTTGTTATGGTCTGCATCTTGTGTACTACTTACCCTTTGTTGAAAGAATCCGCCCTTGATTTTGTGCAAA  
 CCGTTCCAAAGCAAATCGACATCAGAACTTGATCAAAGAATTGAGAAACGTCGAAGGTGTTGAAGAAGTTCAC  
 GAATTGCACGTTTGGCAATTGGCTGGTTCAGAAATTATGCTACCGCTCATATTAAGTGCGAAGATCCAACATC  
 CTATATGGAAGTTGCTAAGACCATCAAGGATGTTTTCCATAACCATGGTATTCATGCCACTACCATTCAACCAG  
 AATTTGCTTCTGTTGGTTCCAAGTCATCTGTTGTTCCATGTGAATTGGCTTGTAGAACTCAATGTGCTTTGAAG  
 CAATGTTGTGGTACTTTGCCACAAGCTCCATCTGGTAAAGATGCTGAAAAAACTCCAGCCGTTTCTATCTCTTG  
 TTTGGAATTGTCTAACAACTTGAAAAAGAAGCCAAGAAGAACAAGGCCGAAAACATTCAGCTGTTGTTATCG  
 AAATCAAGAACATGCCAAACAAGCAACCTGAATCCTCTTTG

**References**

- Edgar, R. C. (2004). MUSCLE: multiple sequence alignment with high accuracy and high throughput. *Nucleic Acids Res.* 32, 1792–7. doi:10.1093/nar/gkh340.
- Ishida, T., and Kinoshita, K. (2007). PrDOS: prediction of disordered protein regions from amino acid sequence. *Nucleic Acids Res.* 35. doi:10.1093/nar/gkm363.
- Waterhouse, A. M., Procter, J. B., Martin, D. M. A., Clamp, M., and Barton, G. J. (2009). Jalview Version 2--a multiple sequence alignment editor and analysis workbench. *Bioinformatics* 25, 1189–91. doi:10.1093/bioinformatics/btp033.
